# Supplementary material for: Modelling and interpreting the isotopic composition of water vapour in convective updrafts
Source: Copernicus journal article supplement (doi:10.5194/acp-13-7903-2013), 2013-08-16
Supplement: Supplementary file 1 [file acp-13-7903-2013-supplement.pdf]

# Modelling and interpreting the isotopic composition of water vapour in convective updrafts: Online Supplement

M. Bolot<sup>1</sup>, B. Legras<sup>1</sup>, and E. J. Moyer<sup>2</sup>

<sup>1</sup>Laboratoire de Météorologie Dynamique, CNRS/ENS, UMR8539, Paris, France

<sup>2</sup>Department of the Geophysical Sciences, University of Chicago, Chicago, USA

Correspondence to: M. Bolot (bolot@lmd.ens.fr)

## 1 Ventilation coefficients, Lewis number

The diffusional growth of a cloud particle (droplet or crystal) falling in the ambient air is influenced by its relative motion. The air flow around a particle depends on particle geometry and the Reynolds number. In all cases, the local gradients of heat and vapour are increased around the moving particle, and the diffusional growth rate and latent heat release rate are enhanced over their corresponding values at rest. The effect is measured by the ventilation coefficients for vapour and heat diffusion:

$$f_v = \frac{(dm/dt)}{(dm/dt)_0},$$

$$f_h = \frac{(dQ/dt)}{(dQ/dt)_0},$$

where the subscript 0 refers to the situation when the particle is stationary relative to the air.

Boundary layer theory predicts that  $f_v$  and  $f_h$  should be proportional to  $X_v = Sc^{\frac{1}{3}} Re^{\frac{1}{2}}$  and  $X_h = Pr^{\frac{1}{3}} Re^{\frac{1}{2}}$ , where  $Sc = \mu/\rho K_v$ ,  $Pr = c_p \mu/k_h$  and  $Re = \rho U_\infty D/\mu$  are, respectively, the Schmidt, Prandtl and Reynolds numbers and  $\mu$  is the dynamic viscosity. The functional dependency of  $f_v$  on  $X_v$  is the same as that of  $f_h$  on  $X_h$  since the underlying mathematical framework is the same. A Schmidt number for heavy isotopologue can be defined as  $Sc' = \eta/\rho K'_v$ ,

From wind tunnel experiments of evaporating drops, (Beard and Pruppacher, 1971) provide the following expressions for  $f_v$ :

$$f_v = \begin{cases} 1 + 0.108 X_v^2 & \text{for } X_v \leq 1.4, \\ 0.78 + 0.308 X_v & \text{for } X_v > 1.4. \end{cases}$$

For ice crystals, we use Pitter et al. (1974) numerical solutions for oblate spheroids ( $\sim$  hexagonal plates):

$$f_v = \begin{cases} 1 + 0.142 X_v^2 + 0.054 X_v^4 \ln(0.893 X_v^2) & \text{for } X_v \leq 0.71, \\ 0.937 + 0.178 X_v & \text{for } X_v > 0.71. \end{cases}$$

The calculation of Re for falling drops and droplets is made after Beard (1976) which distinguishes three regimes according to the diameter of the particles. For ice crystals, assumed to be hexagonal plates, we use the procedure given by Heymsfield and Westbrook (2010).

Some computed values of  $f_v/f_h$  and  $f_v/f'_v$  are compiled in Tables 1 and 2, as a function of particle diameter (the maximum projected length for an hexagonal plate) and altitude within the cloud. As expected from the dependency of  $f$  on Re, it is seen that ventilation effects mostly increase with size.  $f_v/f_h$  and  $f_v/f'_v$  remain, however, close to unity and this justifies the approximation made in this study.

If cloud liquid water and cloud ice behave as pure airborne particles (static relative to the air parcel), then it is obvious that ventilation effects do not matter for fractionation. In particular, cloud droplets whose isotopic content re-equilibrate with that of vapour are small enough to yield values of  $f_v/f_h$  and  $f_v/f'_v$  that differ from 1 by less than 0.1%. Moreover, it can be easily checked (not shown), that absolute values of  $f_v$  and  $f'_v$  at such sizes are sufficiently close to 1 to leave the value of  $\tau_{\text{drop}}$  unaltered, such that the criterion for re-equilibrating droplets is unaffected by ventilation.

Ventilation effects are expected to be more important when precipitating particles are considered. Although our study focuses on droplets, let us consider the case of a falling drop for the sake of comparison. In this case the ratio  $f_v/f'_v$  differs from 1 by less than 0.7% but  $f_v/f_h$  may reach about 0.96. Variations of  $f_v/f_h$  produce variations of the coefficient  $A_l$  which are limited to 2.5%. Finally, the extent to which  $f_v/f_h$

and  $f_v/f'_v$  modify  $\alpha_{kl}$  is respectively 0.006% and 0.015% only. By comparison, the relative difference between  $\alpha_l$  and  $\alpha_{kl}$  is 0.3%. It is clear that ventilation leaves fractionation factors virtually unaffected, even if actual growth rates and latent heat release rates are enhanced by a factor of 8 in our previous computations.

The above results are largely a consequence of  $K_v/K'_v$  and  $Le = Re/Pr = K_h/K_v$  being close to unity. If we had  $Le = 1$ , then we could rigorously set  $f_h = f_v$  (the non-dimensional fields of temperature and vapour density around the particle would exactly coincide). The fact that  $Le \sim 1$  for a vapour-air mixture is to some extent fortuitous. The kinetic theory of gas for rigid elastic spherical molecules (Chapman and Cowling, 1970) can be used to derive the following approximate expression for the Lewis number:

$$Le = \frac{1}{12} \left( 21 \frac{c_p}{c_v} - 5 \right) \frac{25}{68} \sqrt{2} \left( 1 + \frac{\Gamma_{\text{H}_2\text{O}}}{\Gamma_{\text{air}}} \right)^2 \times \left( 1 + \frac{m_{\text{air}}}{m_{\text{H}_2\text{O}}} \right)^{-\frac{1}{2}}, \quad (1)$$

where  $\Gamma_{\text{H}_2\text{O}}$ ,  $\Gamma_{\text{air}}$ ,  $m_{\text{air}}$  and  $m_{\text{H}_2\text{O}}$  are respectively collisional diameters and molecular masses of water and air molecules. In deriving the above expression, we have neglected the contribution of vapour to thermal conductivity, and used a modified Eucken factor  $\frac{1}{12} \left( 21 \frac{c_p}{c_v} - 5 \right)$  as suitable for weakly polar diatomic gases. Taking  $\Gamma_{\text{H}_2\text{O}} = 2.65 \times 10^{-8}$  cm (Hirschfelder et al., 1967),  $\Gamma_{\text{air}} = 3.6 \times 10^{-8}$  cm (Glassman and Hariis, 1952),  $m_{\text{air}}/m_{\text{H}_2\text{O}} = 29/18$ , we find  $Le \sim 0.8$ . A direct calculation (from the expressions of  $K_v$  and  $k_h$  given in Appendix D of the main text) yields 0.87. It is clear that  $Le \sim 1$  is a result of the particular ratios of collisional diameters and molecular masses for water and air, and it is not obvious that this result can be transposed to other gases mixtures (such as in the problem of sulphuric acid deposition for instance).

## 2 Thermal relaxation time and freezing time

The characteristic time of freezing  $t_f$  is computed for droplets freely falling in air. We follow the approach of Johnson and Hallett (1968) and summarise their argument here.

Consider a droplet initially supercooled to the temperature of its surrounding environment  $T^{(\infty)}$ . The initial stage of freezing corresponds to the very fast growth of ice dendrites within the supercooled droplet, until the release of latent heat inside the droplet increases its temperature up to the freezing equilibrium value  $T^{(\text{eq})} = 0^\circ\text{C}$ . This stage is assumed to happen instantly, and turns the droplet into a mixture of liquid water and ice, with a liquid fraction  $1 - c_l (T^{(\text{eq})} - T^{(\infty)}) / L_i$ .

A spherical shell of ice then appears from the surface of the droplet and thickens as the freezing front propagates inward. The rate of freezing at this stage depends on the rate

of heat transfer to the environment, by heat conduction and evaporation to environmental air. The ice water (inner) interface where freezing happens is assumed at radial distance  $r$  from the centre of the droplet and at  $T^{(\text{eq})} = 0^\circ\text{C}$ . The ice air (outer) interface is at radial distance  $a$  (initial radius) and its temperature  $T^{(s)}$  is not much below  $T^{(\text{eq})} = 0^\circ\text{C}$ . Hence, ice evaporation should occur at the freezing droplet surface even when the environment is ice supersaturated at temperature  $T^{(\infty)}$ .

Then, the rate of release of latent heat by freezing is equal to the rate of heat conduction through the ice shell, itself equal to the rate of heat loss by conduction and evaporation to environmental air. These conditions yields (Mason, 1956, Eq. (1)):

$$-L_f \rho_l r^2 \frac{dr}{dt} \left( 1 - c_l \frac{T^{(\text{eq})} - T^{(\infty)}}{L_f} \right) = -k_i a r \frac{T^{(s)} - T^{(\text{eq})}}{a - r}, \quad (2)$$

$$\begin{aligned} -k_i a r \frac{T^{(s)} - T^{(\text{eq})}}{a - r} &= a k_h f_h \left( T^{(s)} - T^{(\infty)} \right) + L_i 4\pi a K_v f_v \left( \rho^{(s)} - \rho^{(\infty)} \right), \end{aligned} \quad (3)$$

where  $k_i$  is the heat conductivity of ice,  $L_f$  is the latent heat of fusion,  $\rho_l$  is the density of liquid water and  $c_l$  is its heat capacity.

For the sake of simplicity, we assume that the environment is saturated over ice, and we set ventilation coefficients  $f_h$  and  $f_v$  to unity (droplets of negligible fall velocity). Then, using Eq. (A4) of the main text and eliminating  $T^{(s)}$  between Eqs. (2) and (3) yields:

$$\frac{a^2 \rho_l L_f \left( 1 - c_l \frac{T^{(\text{eq})} - T^{(\infty)}}{L_f} \right) dy}{k'_{h|i} (T^{(\text{eq})} - T^{(\infty)})} \frac{dy}{dt} = - \frac{1}{(1-m)y^2 + my} \quad (4)$$

where  $y = r/a$ ,  $k'_{h|i} = \left( k_h + \frac{L_i K_v}{T^{(\infty)}} \left( \frac{L_i}{R_g T^{(\infty)}} - 1 \right) \rho_{\text{sat}}^i \right)$  and  $m = k'_{h|i} / k_i$ .

Integrating Eq. (4) from  $(t = 0, y = 1)$  to  $(t = t_f, y = 0)$  yields the expression for the freezing time  $t_f$ :

$$t_f = \frac{a^2 \rho_l L_f \left( 1 - c_l \frac{T^{(\text{eq})} - T^{(\infty)}}{L_f} \right)}{3k'_{h|i} (T^{(\text{eq})} - T^{(\infty)})} \left( 1 + \frac{m}{2} \right). \quad (5)$$

As Johnson and Hallett (1968) note,  $m \ll 1$  in air. Thus, Eq. (5) finally yields:

$$t_f = \frac{a^2 \rho_l L_f \left( 1 - c_l \frac{T^{(\text{eq})} - T^{(\infty)}}{L_f} \right)}{3k'_{h|i} (T^{(\text{eq})} - T^{(\infty)})}. \quad (6)$$

This corresponds to Eq. (5) of Johnson and Hallett (1968) and has been cross-checked against observations in the same work. Freezing time is thus governed by the rate of extraction of latent heat by conduction and evaporation to environmental air while heat conduction through the ice phase occurs over a negligible time (hence  $m \ll 1$ ).

$t_f$  is infinite in the limit  $T \rightarrow 0^\circ\text{C}$ . However, at small supercooling ( $T^{(\text{eq})} - T$ ), other mechanisms extract heat more efficiently than conduction and evaporation to air. Namely, in the vicinity of the  $0^\circ\text{C}$  level, droplets freeze to a large extent by contact with precipitating ice crystals, in which case latent heat extraction happens very fast by conduction through ice. Thus, Eq. (6) must be considered as a lower bound on the freezing relaxation time, and used to show, when it is smaller than the isotopic relaxation time, that freezing does not lead to isotopic fractionation.

The definition of thermal relaxation time  $t_h$  is provided by Mason (1956) assuming for simplicity a spherical droplet or ice crystal freely suspended in the environmental air at temperature  $T^{(\infty)}$ . The ventilation factors are again set to unity (negligible fall velocity). The droplet or crystal temperature is further assumed to have homogeneous temperature  $T$ . Then, the enthalpy of the droplet or crystal may change as a result of heat conduction to air and evaporation or condensation. This enthalpy budget yields, using Eq. (A4) of the main text in the same way as above:

$$\frac{4}{3}\pi a^3 \rho_{l,i} c_{l,i} \frac{dT}{dt} = -4\pi a k'_{h|l,i} (T^{(\infty)} - T), \quad (7)$$

where  $k'_{h|l}$  is defined as  $k'_{h|i}$  but for liquid  $L_l$  and  $\rho_{\text{sat}}^l$ .

The thermal relaxation time for droplets or ice crystals  $t_h$  immediately follows (Mason, 1956, Eq. (15)):

$$t_h = \frac{\rho_{l,i} c_{l,i} a^2}{3k'_{h|l,i}}. \quad (8)$$

One notices from Eq. (8) that  $t_h$  is smaller for ice crystals than for droplets. The fact that thermal relaxation times are much smaller than isotopic relaxation times means that it is safe to derive the evolution of isotopic ratios by assuming steady-state solutions of heat transfer equations as we did in Appendix B of the main text.

## References

- Beard, K. V.: Terminal velocity and shape of cloud and precipitation drops aloft, *J. Atmos. Sci.*, 33, 851–864,
- Beard, K. V. and Pruppacher, H. R.: A wind tunnel investigation of the rate of evaporation of small water drops falling at terminal velocity in air, *J. Atmos. Sci.*, 28, 1455–1464, doi:10.1175/1520-0469(1971)028<1455:AWTIOT>2.0.CO;2, 1971.
- Chapman, S. and Cowling, T. G.: *The Mathematical Theory of Non Uniform Gases*, Cambridge Mathematical Library, Cambridge Univ. Press, Cambridge, UK, 1970.

- Glassman, I. and Hariis, B. L.: Collision diameters of some gases as functions of temperature, *J. Phys. Chem.*, 56, 797–799, doi:10.1021/J150498a036, 1952.
- Heymsfield, A. J. and Westbrook, C. D.: Advances in the estimation of ice particle fall speeds using laboratory and field measurements, *J. Atmos. Sci.*, 67, 2469–2482, doi:10.1175/2010JAS3379.1, 2010.
- Hirschfelder, J. O., Curtiss, C. F., and Bird, R. B.: *Molecular Theory of Gases and Liquid*, Wiley, New York, 1967.
- Johnson, D. A. and Hallett, J.: Freezing and shattering of supercooled water drops, *Q. J. R. Meteorol. Soc.*, 94, 468–482, doi:10.1002/qj.49709440204, 1968.
- Mason, B. J.: On the melting of hailstones, *Q. J. R. Meteorol. Soc.*, 82, 209–216, doi:10.1002/qj.49708235207, 1956.
- Pitter, R. L., Pruppacher, H. R., and Hamielec, A. E.: A numerical study of the effect of forced convection on mass transport from a thin oblate spheroid of ice in air, *J. Atmos. Sci.*, 31, 1058–1066, doi:10.1175/1520-0469(1974)031<1058:ANSOTE>2.0.CO;2, 1974.

| alt. [km] | diameter | $f_v/f_h$        |                  |                  |                   |                   |                   |                   |
|-----------|----------|------------------|------------------|------------------|-------------------|-------------------|-------------------|-------------------|
|           |          | 10 $\mu\text{m}$ | 30 $\mu\text{m}$ | 50 $\mu\text{m}$ | 100 $\mu\text{m}$ | 200 $\mu\text{m}$ | 400 $\mu\text{m}$ | 800 $\mu\text{m}$ |
| 2         | drop     | 0.99999          | 0.99964          | 0.99841          | 0.98989           | 0.97621           | 0.96752           | 0.96127           |
|           | crystal  |                  |                  |                  |                   |                   |                   |                   |
| 6         | drop     | 0.99999          | 0.99975          | 0.99889          | 0.99257           | 0.97892           | 0.97044           | 0.96418           |
|           | crystal  | 0.99999          | 0.99987          | 0.99959          | 0.99818           | 0.99324           | 0.9879            | 0.98124           |
| 10        | drop     | 0.99999          | 0.99983          | 0.99923          | 0.99467           | 0.99643           | 0.97414           | 0.96818           |
|           | crystal  | 0.99999          | 0.99991          | 0.99972          | 0.99871           | 0.9945            | 0.98994           | 0.98403           |
| 14        | drop     |                  |                  |                  |                   |                   |                   |                   |
|           | crystal  | 1                | 0.99994          | 0.99981          | 0.9991            | 0.99585           | 0.99231           | 0.98759           |

**Table 1.** Tabulated values of  $f_v/f_h$  as a function of particle diameter and altitude within the cloud.

| alt. [km] |         | $f_v/f'_v$       |                  |                  |                   |                   |                   |                   |
|-----------|---------|------------------|------------------|------------------|-------------------|-------------------|-------------------|-------------------|
|           |         | 10 $\mu\text{m}$ | 30 $\mu\text{m}$ | 50 $\mu\text{m}$ | 100 $\mu\text{m}$ | 200 $\mu\text{m}$ | 400 $\mu\text{m}$ | 800 $\mu\text{m}$ |
| 2         | drop    | 1                | 0.99994          | 0.99974          | 0.99834           | 0.99597           | 0.99445           | 0.99335           |
|           | crystal | 1                |                  |                  |                   |                   |                   |                   |
| 6         | drop    | 1                | 0.99996          | 0.99981          | 0.9987            | 0.99621           | 0.99465           | 0.99348           |
|           | crystal | 1                | 0.99998          | 0.99993          | 0.99968           | 0.9988            | 0.99784           | 0.99664           |
| 10        | drop    | 1                | 0.99997          | 0.99985          | 0.99897           | 0.99643           | 0.99483           | 0.99361           |
|           | crystal | 1                | 0.99998          | 0.99995          | 0.99975           | 0.99892           | 0.99801           | 0.99683           |
| 14        | drop    | 1                |                  |                  |                   |                   |                   |                   |
|           | crystal | 1                | 0.99999          | 0.99995          | 0.99978           | 0.99899           | 0.99812           | 0.99696           |

**Table 2.** Tabulated values of  $f_v/f'_v$  (for the HDO/H<sub>2</sub>O system) as a function of particle diameter and altitude within the cloud.
